# Supplementary material
Source: PubMed Central journal article supplement (PMC9157133)

Figure S1

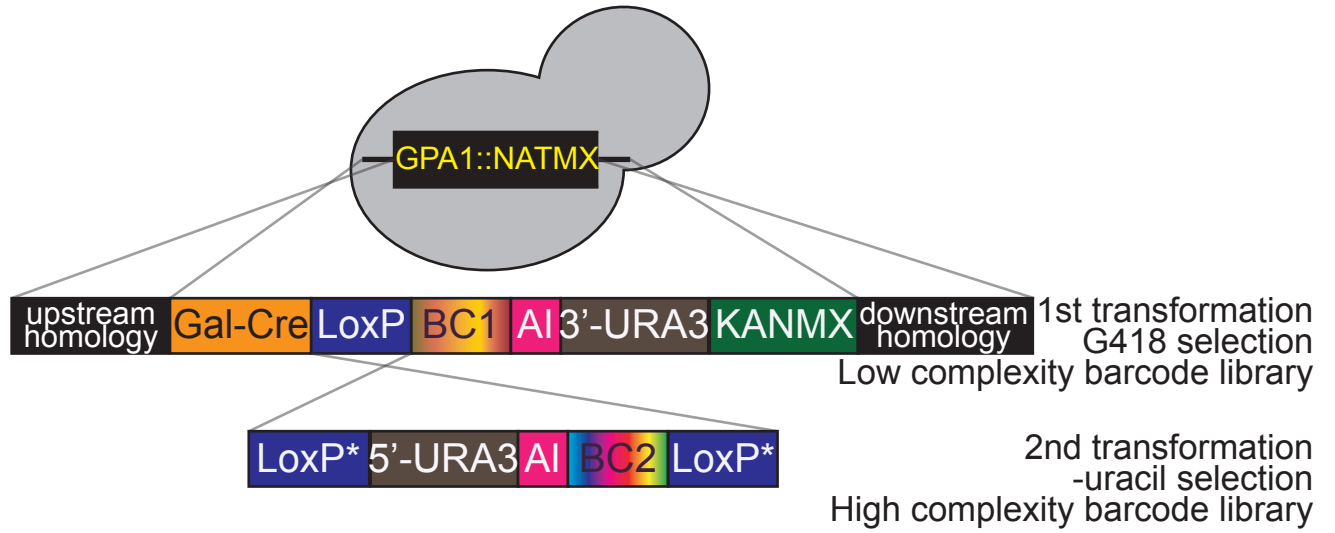

Final locus

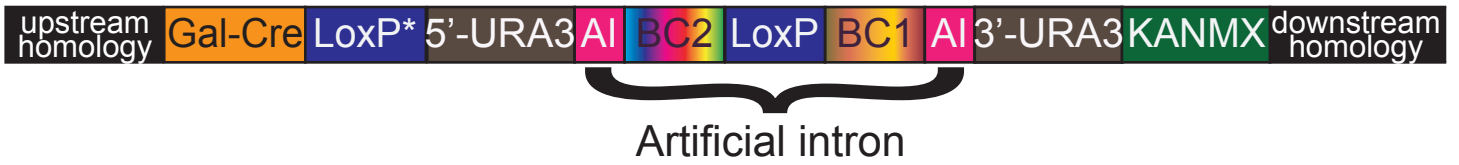

Supplement: iyac061_figure_s1.pdf [file iyac061_figure_s1.pdf]

Figure S2

A

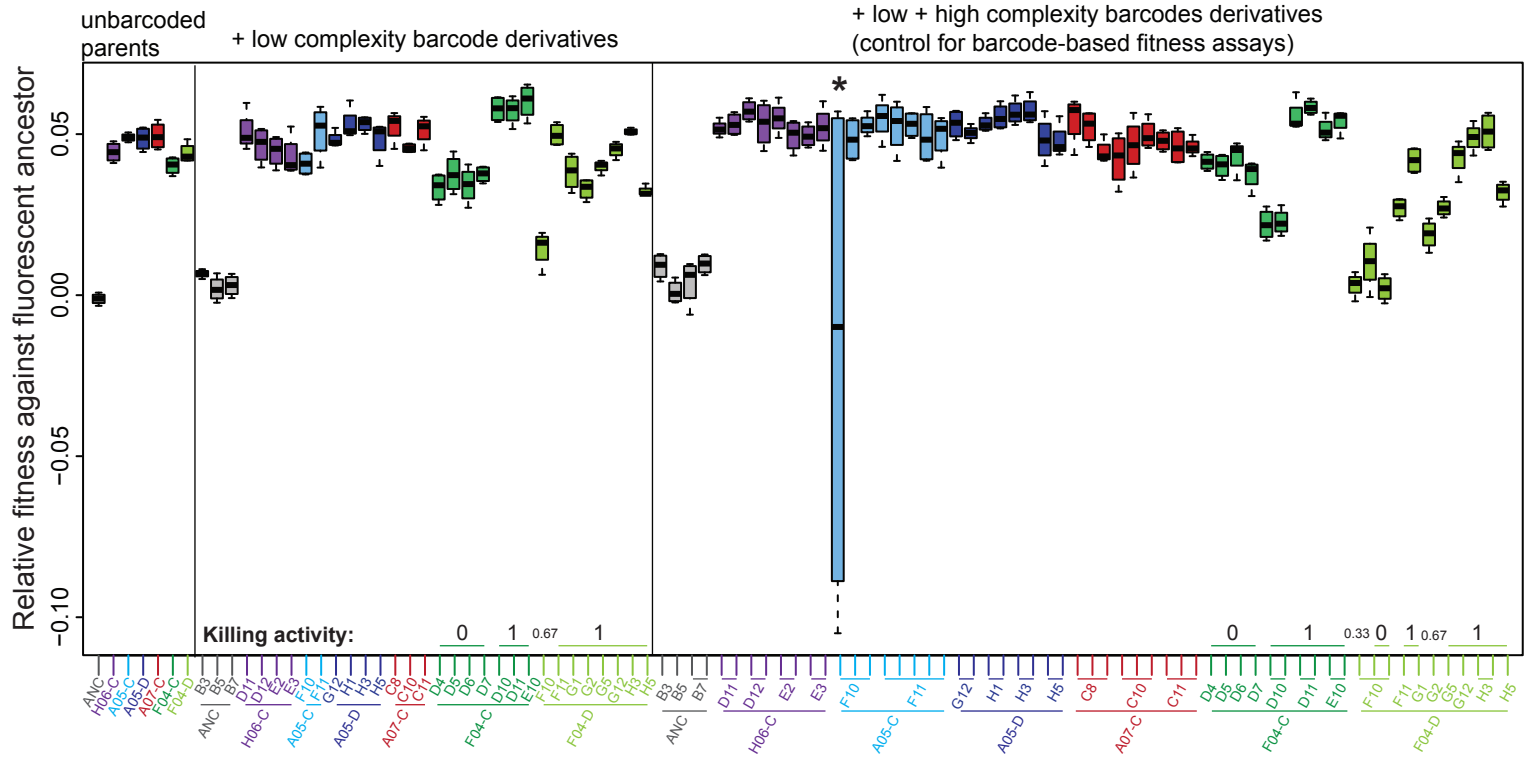

B

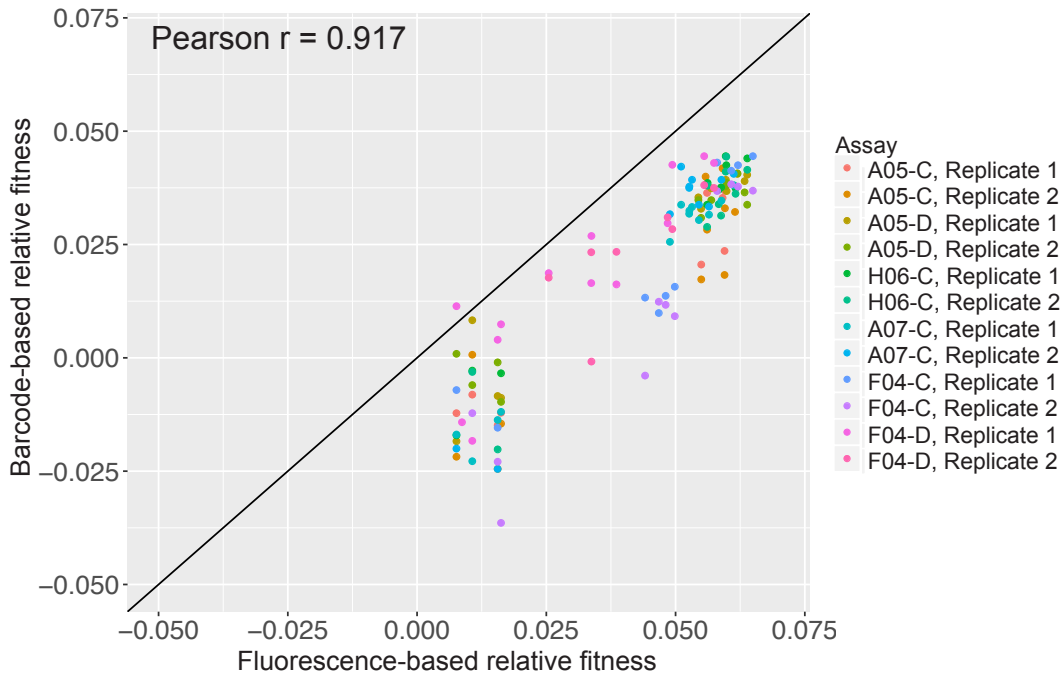

Supplement: iyac061_figure_s2.pdf [file iyac061_figure_s2.pdf]

Figure S3

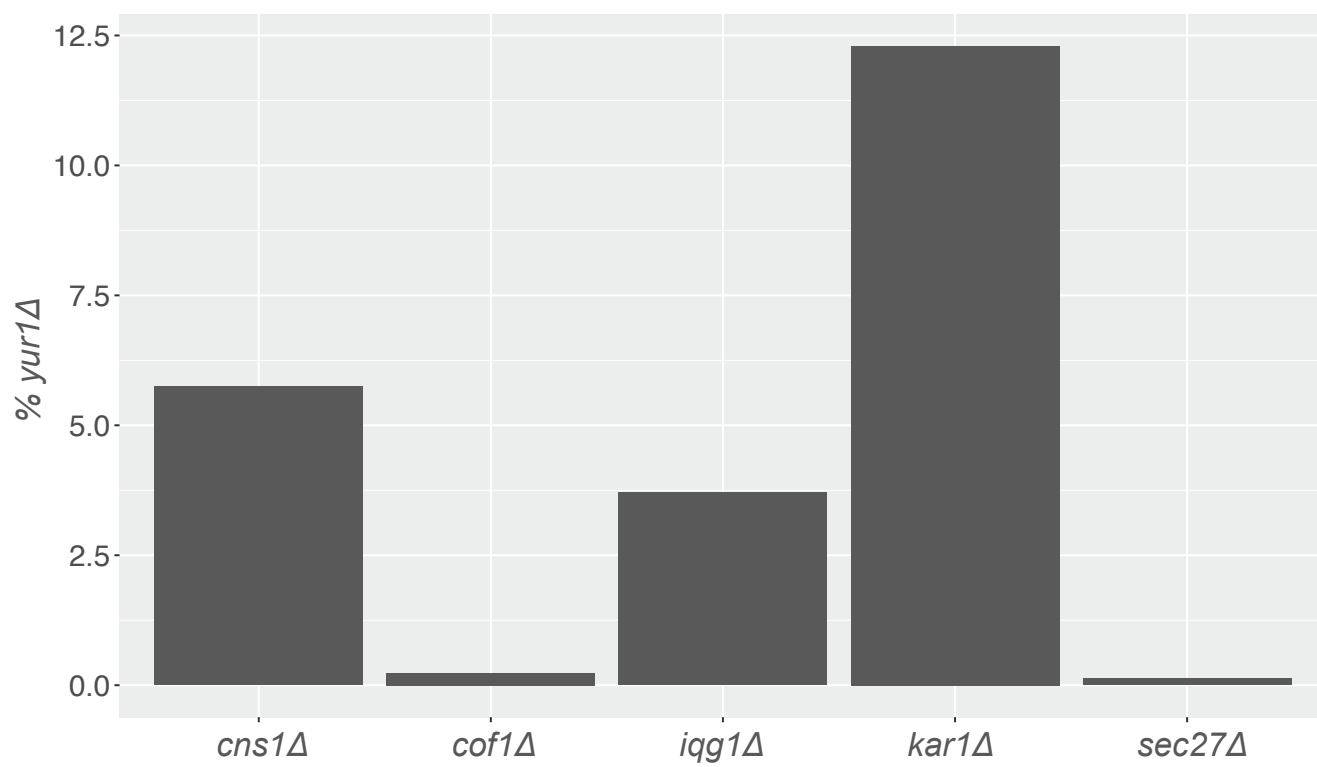

Supplement: iyac061_figure_s3.pdf [file iyac061_figure_s3.pdf]

Figure S4

Conditions:  
mixing antibiotics

+ +

+ -

- +

- -

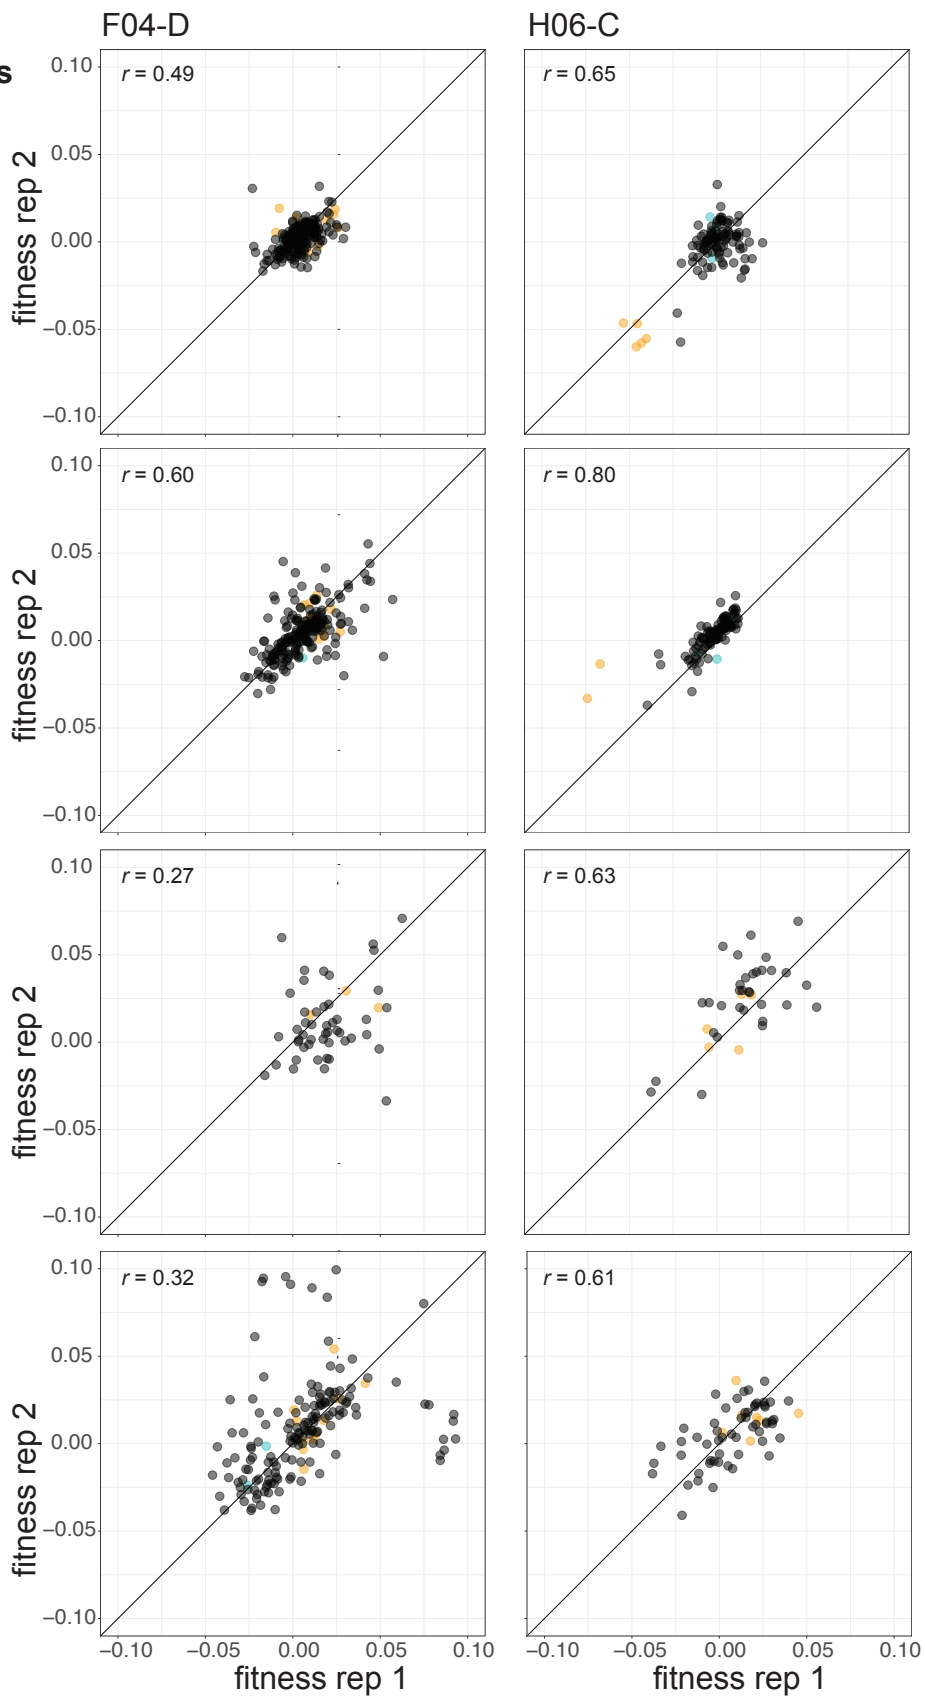

Supplement: iyac061_figure_s4.pdf [file iyac061_figure_s4.pdf]

Figure S5

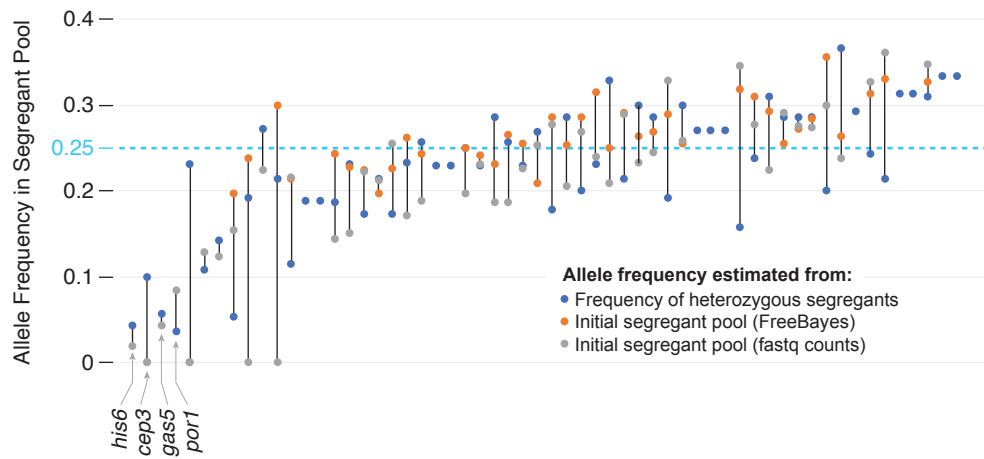

Supplement: iyac061_figure_s5.pdf [file iyac061_figure_s5.pdf]
